# Supplementary material
Source: PubMed Central journal article supplement (PMC6121968)
Supplement: zam018188737s1.pdf [file zam018188737s1.pdf]

1 **Supplemental Materials**

2

3 **Tables**

4 **Table S1.** Pearson correlation analysis between soil physicochemical variables and AOA or  
5 AOB abundance or nitrification activity

6 **Table S2.** Pearson correlation analysis between soil physicochemical variables and relative  
7 abundance of AOA clades (>0.1%)

8 **Table S3.** Pearson correlation analysis between soil physicochemical variables and relative  
9 abundance of AOB clusters (>0.1%)

10

11 **Figures**

12 **Fig. S1.** Measures of soil AOA and AOB *amoA* gene diversity in the treatments. Different  
13 letters denote significant differences between treatments at  $P < 0.05$ . Vertical bars represent  
14 SEMs (n = 3)

15 **Fig. S2.** Multivariate regression tree analysis of AOA (a), AOB (b) community structure and  
16 soil physicochemical variables

17 **Fig. S3.** Phylogenetic analysis of AOA *amoA* genes retrieved from soils in different  
18 treatments. The dominant OTUs (relative abundance > 0.1%; 92% similarity) and reference  
19 sequences available in GenBank were used to construct the phylogenetic tree. Bootstrap  
20 values of >50% based on 1000 replicates are shown next to the branches. Bars indicate 0.05  
21 substitutions per position. Relative abundances of specific OTUs are shown following the  
22 OTU names and presented in bold in parentheses.

23 **Fig. S4.** Phylogenetic analysis of AOB *amoA* genes retrieved from soils in different  
24 treatments. The dominant OTUs (relative abundance > 0.1% ; 92% similarity) and reference  
25 sequences available in GenBank were used to construct the phylogenetic tree. Bootstrap  
26 values of >50% based on 1000 replicates are shown next to the branches. Bars indicate 0.05  
27 substitutions per position. Relative abundances of specific OTUs are shown following the  
28 OTU names and presented in bold in parentheses.

29 **Fig. S5.** Relationship between nitrification activity and AOA (a) and AOB (b) *amoA* gene  
30 abundance in the treatments, excluding NL. Shaded area indicates 95% confidence interval of  
31 the regression models

32

**Table S1.** Pearson correlation analysis between soil physicochemical variables and AOA or AOB abundance or nitrification activity.

|                        | pH              | SOC    | DOC    | TN     | DON            | NH <sub>4</sub> <sup>+</sup> -N | NO <sub>3</sub> <sup>-</sup> -N | AP     | AK              | DC <sub>o</sub> |
|------------------------|-----------------|--------|--------|--------|----------------|---------------------------------|---------------------------------|--------|-----------------|-----------------|
| AOA <i>amoA</i>        | <b>-0.565**</b> | -0.228 | -0.177 | -0.356 | 0.274          | 0.208                           | <b>0.572**</b>                  | -0.096 | <b>-0.575**</b> | 0.261           |
| AOB <i>amoA</i>        | <b>0.773***</b> | -0.121 | -0.124 | 0.016  | <b>-0.469*</b> | 0.031                           | <b>-0.638**</b>                 | -0.165 | <b>0.548*</b>   | 0.154           |
| Nitrification activity | <b>0.942***</b> | -0.192 | -0.088 | -0.103 | <b>-0.449*</b> | 0.093                           | <b>-0.653**</b>                 | -0.111 | 0.313           | 0.096           |

Values in bold indicate correlations, where \*\*\* $P < 0.001$ , \*\* $P < 0.01$ , and \* $P < 0.05$ .

**Table S2.** Pearson correlation analysis between soil physicochemical variables and relative abundance of AOA clades (>0.1%).

|                             | pH               | SOC            | DOC            | TN             | DON            | NH <sub>4</sub> <sup>+</sup> -N | NO <sub>3</sub> <sup>-</sup> -N | AP             | AK             | DC <sub>o</sub> |
|-----------------------------|------------------|----------------|----------------|----------------|----------------|---------------------------------|---------------------------------|----------------|----------------|-----------------|
| Clade A                     | <b>0.863***</b>  | <b>0.468*</b>  | <b>0.533*</b>  | 0.354          | <b>-0.465*</b> | -0.008                          | <b>-0.500*</b>                  | <b>0.592**</b> | 0.391          | <b>-0.575**</b> |
| Clade B1                    | <b>-0.790***</b> | <b>-0.473*</b> | <b>-0.458*</b> | <b>-0.454*</b> | <b>0.436*</b>  | 0.052                           | <b>0.451*</b>                   | <b>-0.537*</b> | <b>-0.485*</b> | <b>0.588**</b>  |
| Clade B2                    | -0.348           | 0.160          | -0.124         | 0.412          | -0.024         | -0.022                          | -0.007                          | -0.040         | 0.301          | -0.128          |
| Clade B3                    | <b>-0.511*</b>   | <b>0.448*</b>  | 0.062          | <b>0.567**</b> | 0.227          | -0.298                          | 0.278                           | 0.141          | 0.229          | -0.388          |
| Clade B4                    | <b>0.942***</b>  | -0.170         | -0.014         | -0.093         | -0.391         | 0.146                           | <b>-0.613**</b>                 | -0.035         | 0.272          | 0.031           |
| Clade C                     | 0.287            | 0.092          | -0.156         | 0.237          | -0.300         | 0.149                           | <b>-0.467*</b>                  | -0.096         | 0.412          | -0.118          |
| Clade E                     | -0.188           | <b>0.644**</b> | 0.357          | <b>0.658**</b> | -0.010         | <b>-0.482*</b>                  | 0.340                           | 0.273          | 0.374          | <b>-0.482*</b>  |
| Clade F                     | <b>0.911***</b>  | -0.221         | -0.093         | -0.133         | -0.354         | 0.205                           | <b>-0.613**</b>                 | -0.110         | 0.279          | 0.096           |
| Clade <i>Nitrososphaera</i> | <b>-0.905***</b> | -0.409         | <b>-0.478*</b> | -0.300         | <b>0.475*</b>  | 0.013                           | <b>0.526*</b>                   | <b>-0.491*</b> | -0.392         | <b>0.489*</b>   |

Values in bold indicate correlations, where \*\*\*  $P < 0.001$ , \*\*  $P < 0.01$ , and \*  $P < 0.05$ .

**Table S3.** Pearson correlation analysis between soil physicochemical variables and relative abundance of AOB clusters (>0.1%).

|                                | pH               | SOC             | DOC             | TN             | DON            | NH <sub>4</sub> <sup>+</sup> -N | NO <sub>3</sub> <sup>-</sup> -N | AP              | AK     | DC <sub>o</sub>  |
|--------------------------------|------------------|-----------------|-----------------|----------------|----------------|---------------------------------|---------------------------------|-----------------|--------|------------------|
| <i>Nitrospira</i> cluster 3a.1 | <b>0.920***</b>  | -0.221          | -0.098          | -0.140         | -0.349         | 0.190                           | <b>-0.627**</b>                 | -0.120          | 0.282  | 0.103            |
| <i>Nitrospira</i> cluster 3a.2 | -0.022           | -0.344          | -0.300          | -0.336         | 0.403          | -0.099                          | -0.033                          | -0.349          | -0.270 | 0.383            |
| <i>Nitrospira</i> cluster 3c   | 0.081            | <b>0.826***</b> | <b>0.876***</b> | <b>0.577**</b> | -0.125         | -0.154                          | 0.067                           | <b>0.951***</b> | 0.064  | <b>-0.910***</b> |
| <i>Nitrospira</i> cluster 8a   | <b>-0.736***</b> | 0.138           | -0.000          | 0.142          | 0.079          | -0.037                          | <b>0.492*</b>                   | 0.030           | -0.080 | -0.053           |
| <i>Nitrospira</i> cluster 8b   | <b>0.762***</b>  | 0.032           | 0.157           | 0.049          | <b>-0.436*</b> | -0.005                          | <b>-0.461*</b>                  | 0.076           | 0.256  | -0.031           |

Values in bold indicate correlations, where \*\*\*  $P < 0.001$ , \*\*  $P < 0.01$ , and \*  $P < 0.05$ .

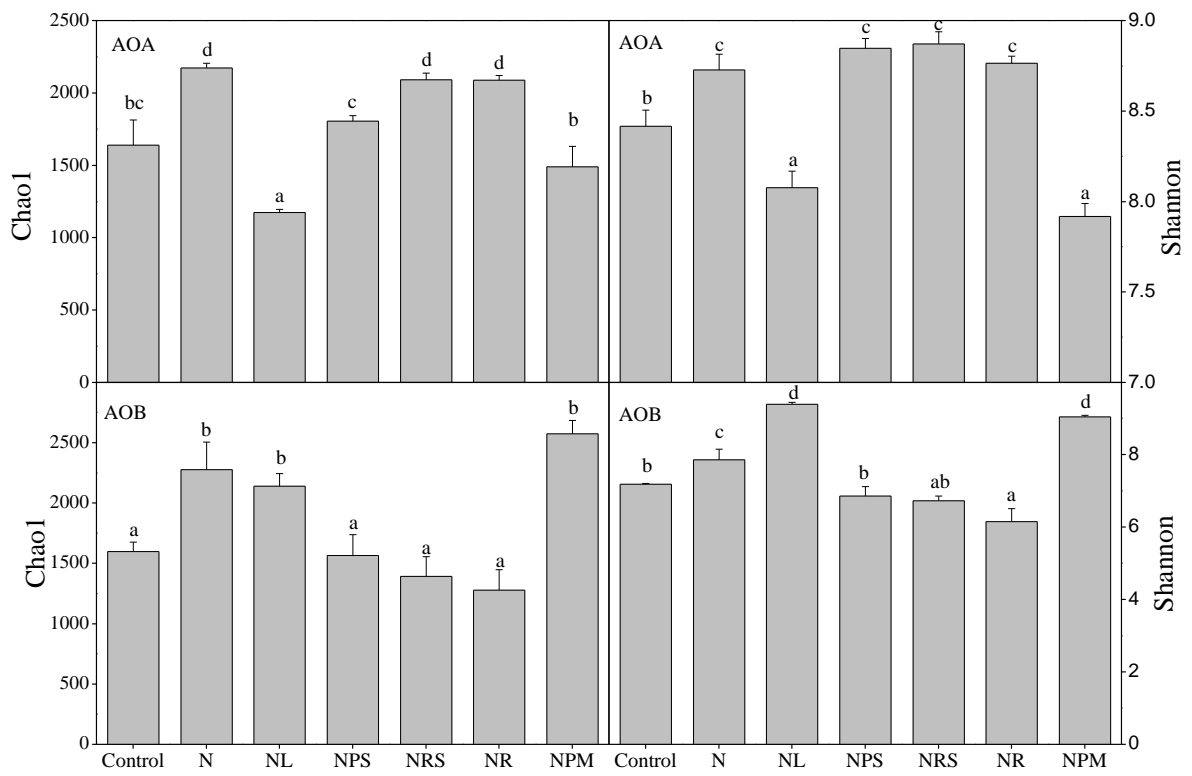

**Fig. S1.** Measures of soil AOA and AOB *amoA* gene diversity in the treatments. Different letters denote significant differences between treatments at  $P < 0.05$ . Vertical bars represent SEMs (n = 3).

(a)

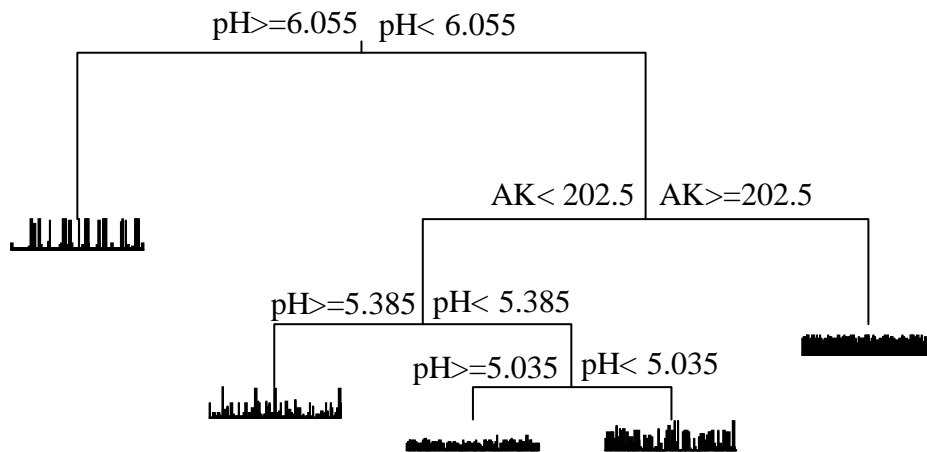

(b)

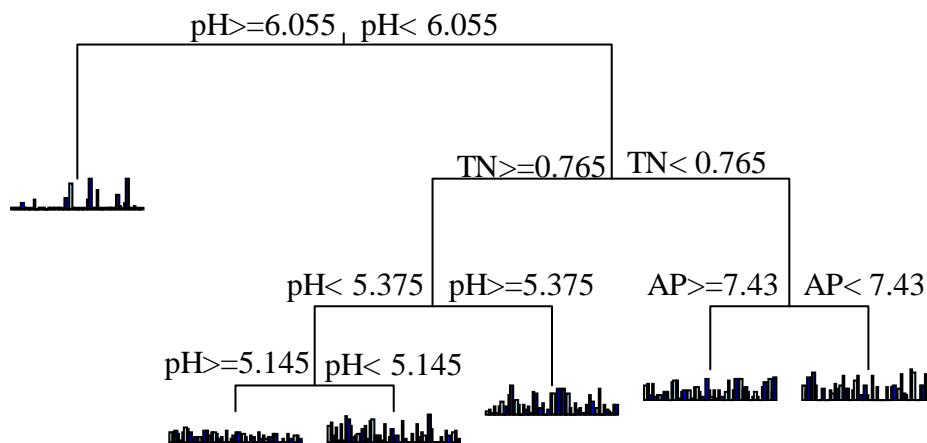

**Fig. S2.** Multivariate regression tree analysis of AOA (a), AOB (b) community structure and soil physicochemical variables.

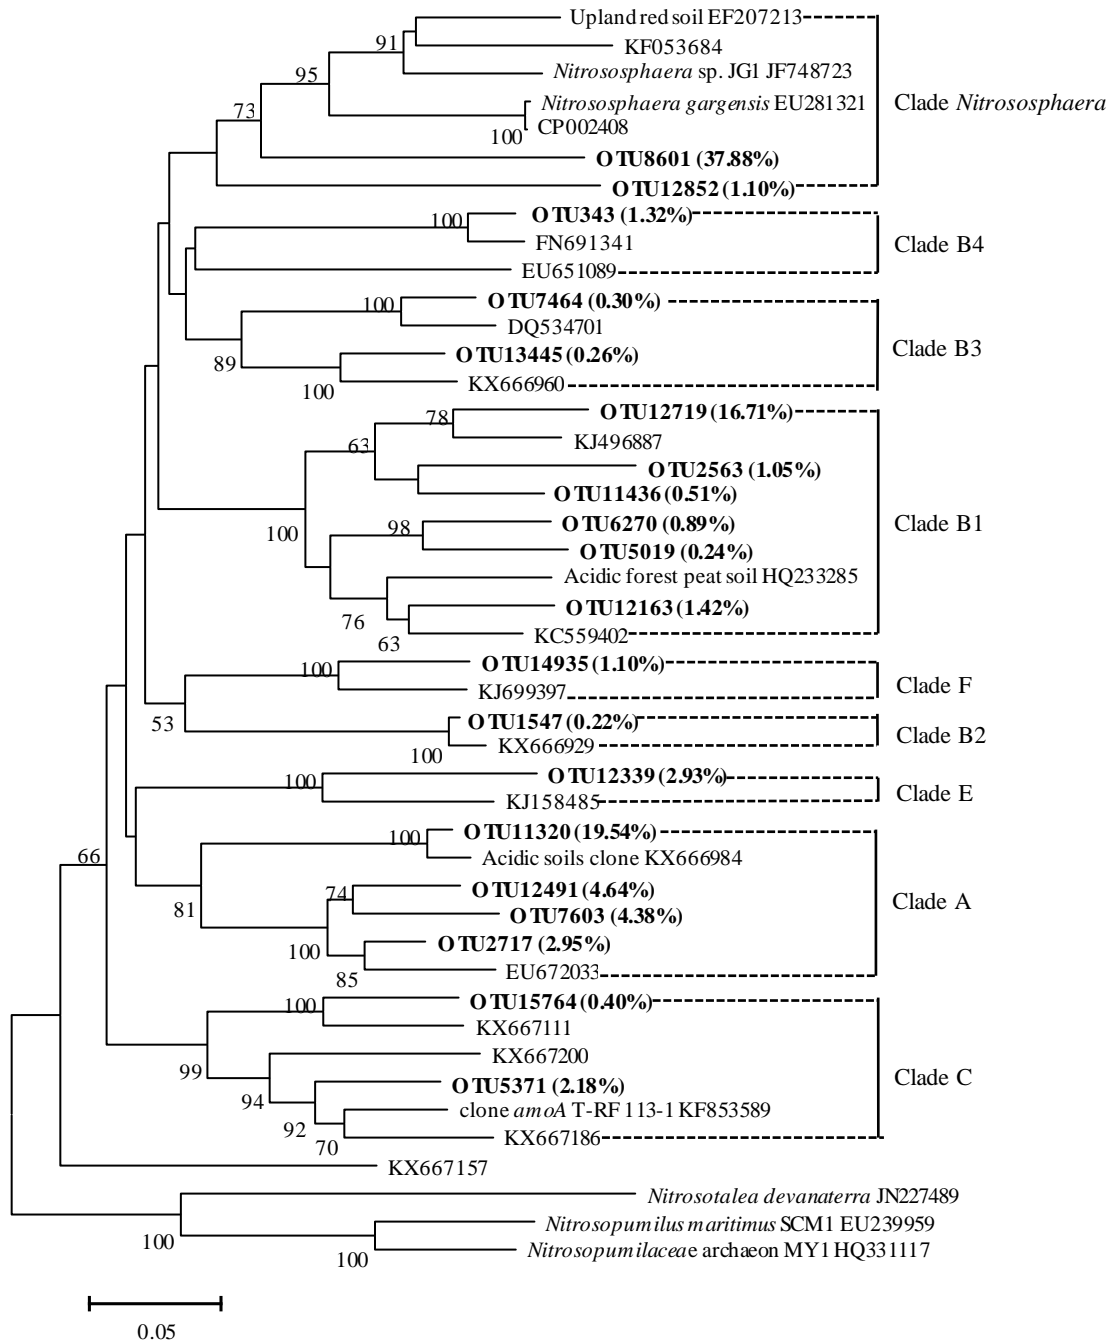

**Fig. S3.** Phylogenetic analysis of AOA *amoA* genes retrieved from soils in different treatments. The dominant OTUs (relative abundance > 0.1%; 92% similarity) and reference sequences available in GenBank were used to construct the phylogenetic tree. Bootstrap values of >50% based on 1000 replicates are shown next to the branches. Bars indicate 0.05 substitutions per position. Relative abundances of specific OTUs are shown following the OTU names and presented in bold in parentheses.



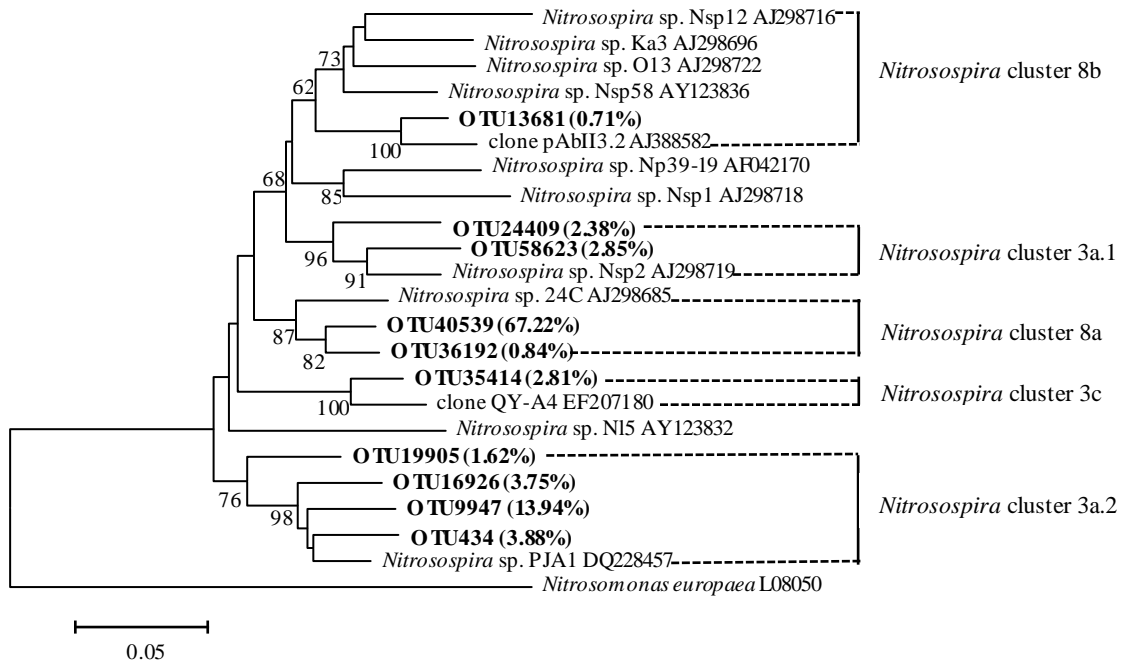

**Fig. S4.** Phylogenetic analysis of AOB *amoA* genes retrieved from soils in different treatments. The dominant OTUs (relative abundance > 0.1%; 92% similarity) and reference sequences available in GenBank were used to construct the phylogenetic tree. Bootstrap values of >50% based on 1000 replicates are shown next to the branches. Bars indicate 0.05 substitutions per position. Relative abundances of specific OTUs are shown following the OTU names and presented in bold in parentheses.

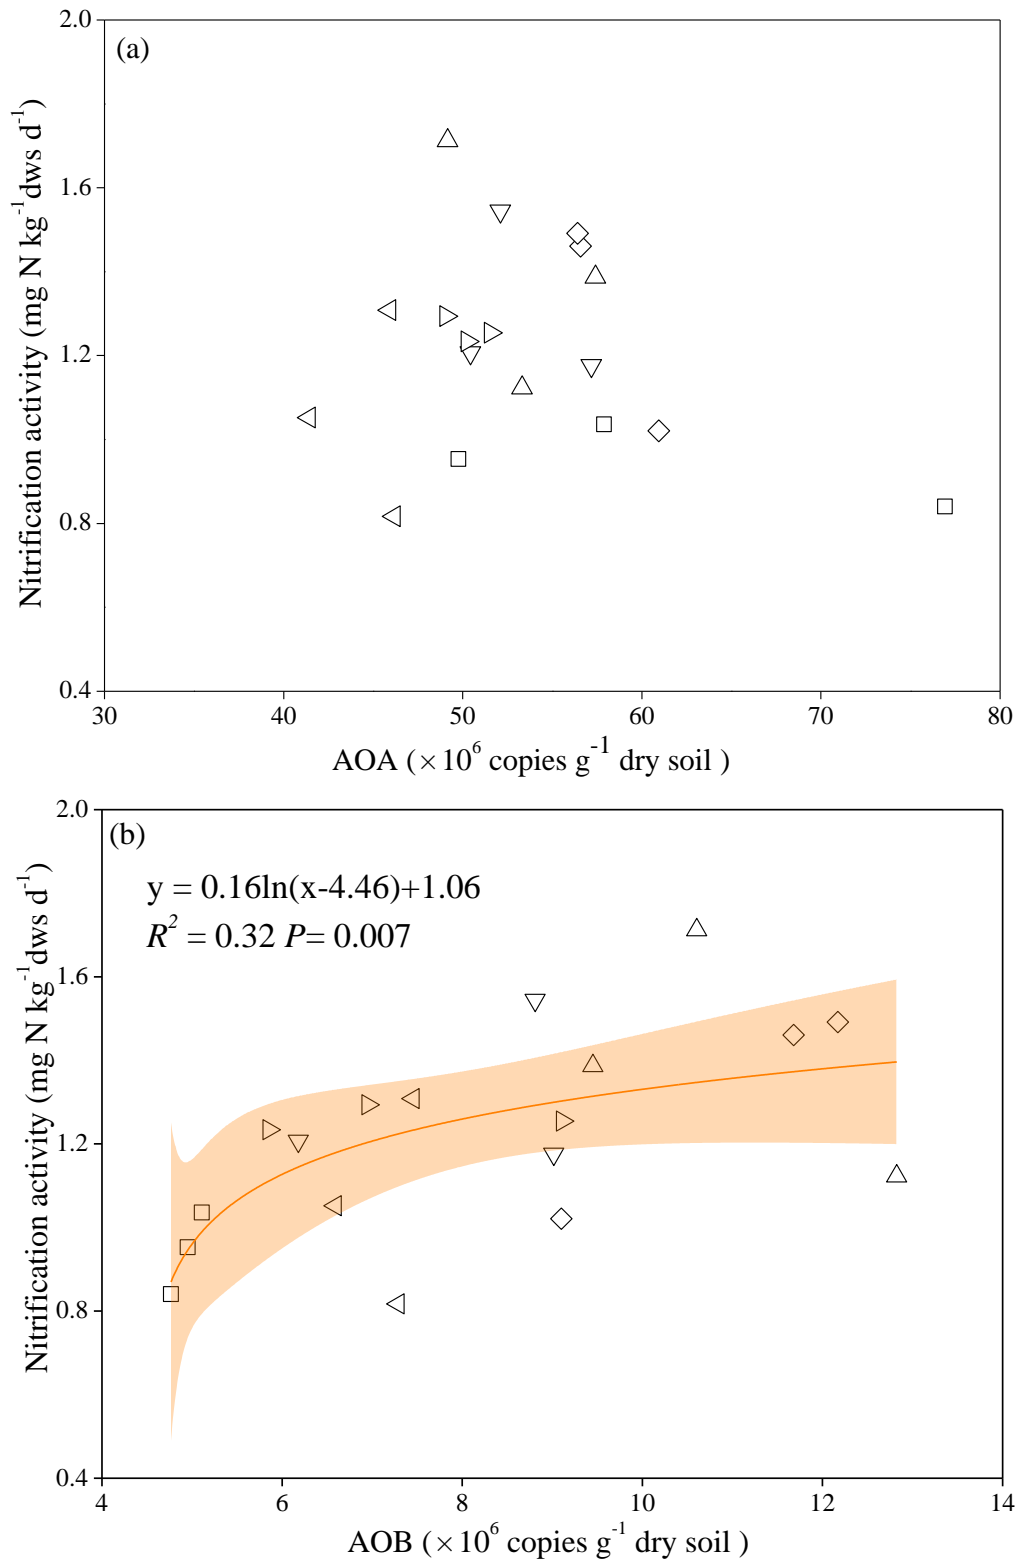

**Fig. S5.** Relationship between nitrification activity and AOA (a) and AOB (b) *amoA* gene abundance in the treatments, excluding NL. Shaded area indicates 95% confidence interval of the regression models.
